# Supplementary material
Source: PubMed Central journal article supplement (PMC2787092)
Supplement: NIHMS145188-supplement-01.pdf [file NIHMS145188-supplement-01.pdf]

## Supplementary Figure Legends

**Supplementary Figure 1.** Scheme of *Rosa26* locus targeting. The Southern blot shows the wild type and targeted locus upon EcoR1 digestion of genomic DNA and probed with probe A as shown in the schematic.

**Supplementary Figure 2.** Expansion of Marginal Zone B cells in *P110\*<sup>+/+</sup>; CD21-cre; B1-8f/J<sub>H</sub>T* compound mutant mice.

**Supplementary Figure 3.** IKK2CA expression in mature B cells. Representative FACS analysis of splenic B cells of *C57Bl/6* (B6) and *IKK2CA<sup>+/+</sup>; CD21-cre* mice. The left column shows expression of surface IgM on mature B cells and the right column shows GFP expression, indicative of transgene expression on mature B cells.

**Supplementary Figure 4.** QRT-PCR analysis of transcript levels of NF- $\kappa$ B genes and targets in sorted IgM<sup>pos</sup> and IgM<sup>neg</sup> mature splenic B cells of *CD21-cre; B1-8f/J<sub>H</sub>T* and *P110\*<sup>+/+</sup>; CD21-cre; B1-8f/J<sub>H</sub>T* mice. Each bar is an average of values obtained from two mice and the dots represent individual mice.

**Supplementary Figure 5.** Expression of MEK1DD and RacDA fails to rescue BCR<sup>neg</sup> B cells. (A) FACS analysis of lymphocytes from spleens of *CD21-cre; B1-8f/J<sub>H</sub>T* (left column), *MEK1DD<sup>+/+</sup>; CD21-cre; B1-8f/J<sub>H</sub>T* (middle panel) and *RacDA<sup>+/+</sup>; CD21-cre; B1-8f/J<sub>H</sub>T* mice. (B) Western blot analysis showing increase in phospho-Erk levels in splenic B cells isolated from *MEK1DD<sup>+/+</sup>; CD21-cre* mice. (C) Rac activation assay showing efficient binding of RacDA to PAK1 in splenic B cells isolated from

RacDA/+; CD19-cre mice. The RacDA cDNA also contains 3X HA tag and can be detected using an anti-HA antibody.

**Supplementary Figure 6.** Comparison of cell size (FSC), and surface expression of the B cell markers B220, CD19, CD23 and CD21 between IgM<sup>pos</sup> (grey) and IgM<sup>neg</sup> (black) splenic follicular B cells of *CD21-cre; B1-8f/J<sub>H</sub>T* (top row) and *PtenΔ/f; CD21-cre; B1-8f/J<sub>H</sub>T* (bottom row) mice.

**Supplementary Figure 7. Survival of resting B cells through the BCR is mediated by PI3K-FOXO pathway.** FACS analysis of lymphocytes from bone marrow and peritoneal cavity (PEC) of *B1-8f/J<sub>H</sub>T* (left column), *CD21-cre; B1-8f/J<sub>H</sub>T* (middle column) and *Foxo1Δ/f; CD21-cre; B1-8f/J<sub>H</sub>T* (right column) showing rescue of IgM<sup>neg</sup> mature B cells by deletion of Foxo1.

**Supplementary Figure 8.** (A) FACS analysis of splenic B cells showing lack of MZ B cells (CD1d high, CD21 high) in the IgM<sup>neg</sup> gate of *Foxo1Δ/f; CD21-cre; B1-8f/J<sub>H</sub>T* (bottom row) mice. (B) Comparison of cell size (FSC, left column), and surface expression of CD23 (right column) between IgM<sup>pos</sup> (grey) and IgM<sup>neg</sup> (black) follicular B cells from spleen of *CD21-cre; B1-8f/J<sub>H</sub>T* (top row) and *Foxo1Δ/f; CD21-cre; B1-8f/J<sub>H</sub>T* (bottom row) mice.

**Supplementary Figure 9. Limited Rescue of IgM<sup>neg</sup> B cells by haplo-insufficiency of Foxo1.** (A) Western blot analysis of sorted IgM<sup>pos</sup> and IgM<sup>neg</sup> splenic mature B cells from mice as indicated in the figure for Foxo1 (Top panel) and Actin (bottom panel). (B) FACS analysis of lymphocytes from spleen and lymph

nodes (LN) of *CD21-cre; B1-8f/J<sub>H</sub>T* (left column) and *Foxo1 $\Delta$ /+; CD21-cre; B1-8f/J<sub>H</sub>T* (right column) showing significant rescue of IgM<sup>neg</sup> B cells in the latter.

**Supplementary Figure 10. Dependence of PI3K activity in mature B cells on BCR expression and moderate activation of PI3K by P110\* at Pten deletion.**

Immunoblot analysis for phospho-Akt and Akt (panel A), phospho- GSK3a/b and actin (panel B) and phospho-S6K and S6K (panel C) in sorted IgM<sup>+</sup> and IgM<sup>-</sup> Mature B cells from mice of genotype as indicated in the figure. For activation experiments in lanes 1-4, panel C, mature B cells were sorted and incubated in B cell medium with 10% FCS at 37°C for 1h before any further treatment. Subsequently cells were treated with PI3K inhibitor, LY294002 (10uM) or DMSO for 30min followed by anti-IgM (50ug/ml) stimulation for 15 min. Lanes 5-10 represent ex vivo isolated cells of the genotypes as indicated in the figure.

Supplementary Table1. Primers used for quantitative RT-PCR are listed

|          |                                                         |
|----------|---------------------------------------------------------|
| RAG1     | Fw-TTGCTATCTCTGTGGCATCG<br>Rev-AATTTTCATCGGGTGCAGAAC    |
| AICDA    | Fw-GGACTTCGGCCACCTTC<br>Rev-CATCTCAGAACTCAGCCACG        |
| BCL2L11  | Fw-CTGCGCCCGGAGATACG<br>Rev-CCATACCAGACGGAAGATAAA       |
| P27/Kip1 | Fw-GGCCCGGTCAATCATGAA<br>Rev-CTTGCGCTGACTCGCTTCTT       |
| IRF4     | Fw-AGGTCTGCTGAAGCCTTGGC<br>Rev-CTTCAGGGCTCGTCGTGGTC     |
| NFkB1A   | Fw-TTGGTCAGGTGAAGGGAGAC<br>Rev-GCTTTCAGAAGTGCCTCAGC     |
| cREL     | Fw-GACAACAACCGGACATACCC<br>Rev-CCATCTCTGCAATCTTTTCC     |
| P100     | Fw-TTTCCTTCGAGCTAGCGATG<br>Rev-TTCGGGAGATCTTCAGGTTC     |
| ID2      | Fw-GACAGAACCAGGCGTCCAGG<br>Rev-GGGAATTCAGATGCCTGCAAGGAC |
| BCLxL    | Fw-GGTGAGTCGGATTGCAAGTT<br>Rev-GCTGCATTGTTCCCGTAGAG     |
| BCL3     | Fw-TCCAGAATAACATAGCCGCTGT<br>Rev- CATGCCAGGTGAATTGCAGTC |

## **Supplementary methods**

**Rac Activation assay:** This was done on B cell lysates using the rac activation assay kit from Upstate Biotechnology according to the manufacturers instructions.

**Immunoblot analysis:** To prepare whole cell lysates, sorted mature B cells (B220+, AA4.1-) were lysed for 10 min on ice with RIPA buffer containing complete protease inhibitor cocktail (Roche Diagnostics), 1 mM sodium orthovanadate, 5 mM sodium fluoride and 0.5mM phenylmethylsulfonyl fluoride. Antibodies directed against Pten (clone C38G6), Foxo1 (clone C38G6), Phospho-Akt (ser473, Cat No. 9271), Phospho-Gsk3 $\alpha/\beta$  (clone 37F11), Phospho-P70S6K (clone 108D2), Phospho-Erk (Cat No. 9101), Akt (clone C73H10), P70S6K (clone 49D7) were from Cell Signalling Technologies.  $\beta$ -actin-specific monoclonal antibody (clone AC-74) was from Sigma-Aldrich. For activation experiments mature B cells were sorted and incubated in B cell medium (containing 10% FCS) at 37°C for 1h before any treatment. Subsequently cells were treated with PI3K inhibitor, LY294002 (10uM) or DMSO for 30min followed, if applicable, by anti- IgM (50ug/ml) stimulation for 15 min.

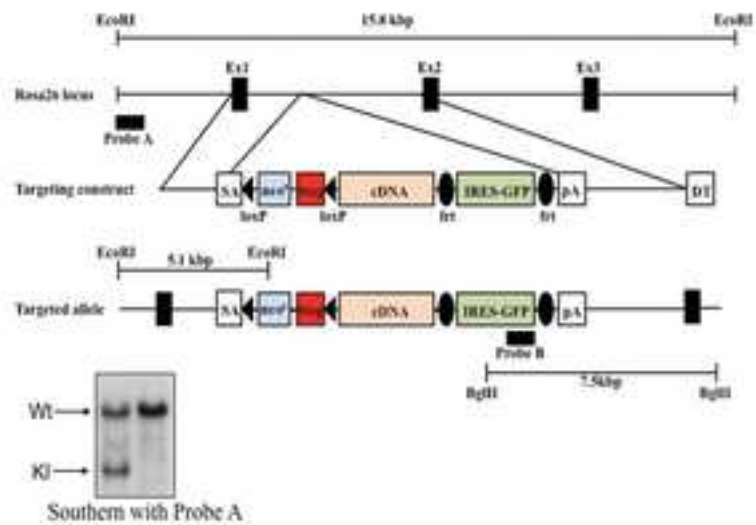

Supplementary Figure 1

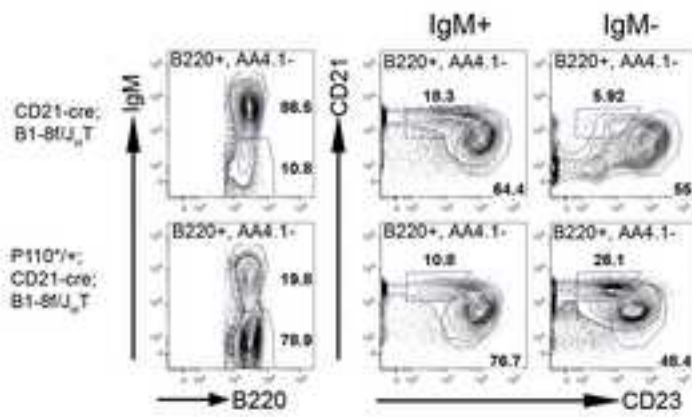

Supplementary Figure 2

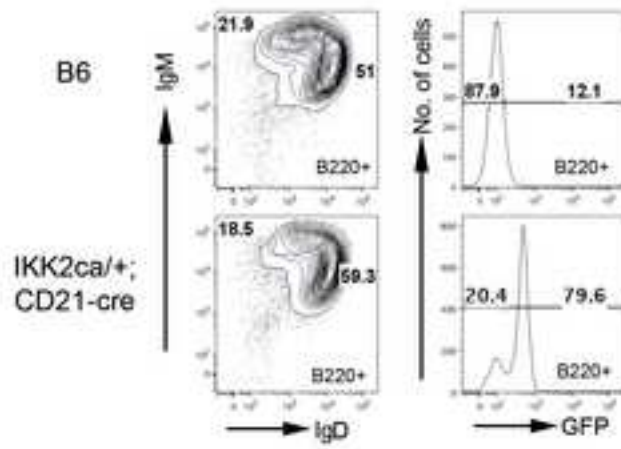

Supplementary Figure 3



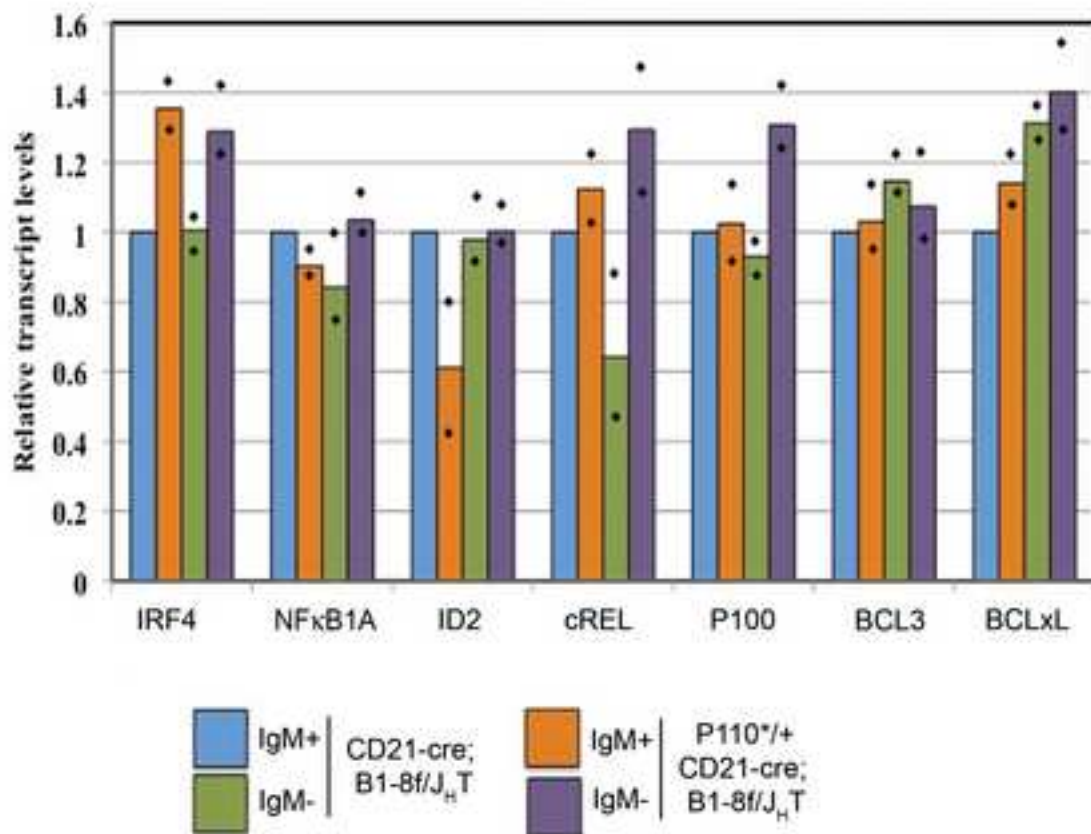

Supplementary Figure 4

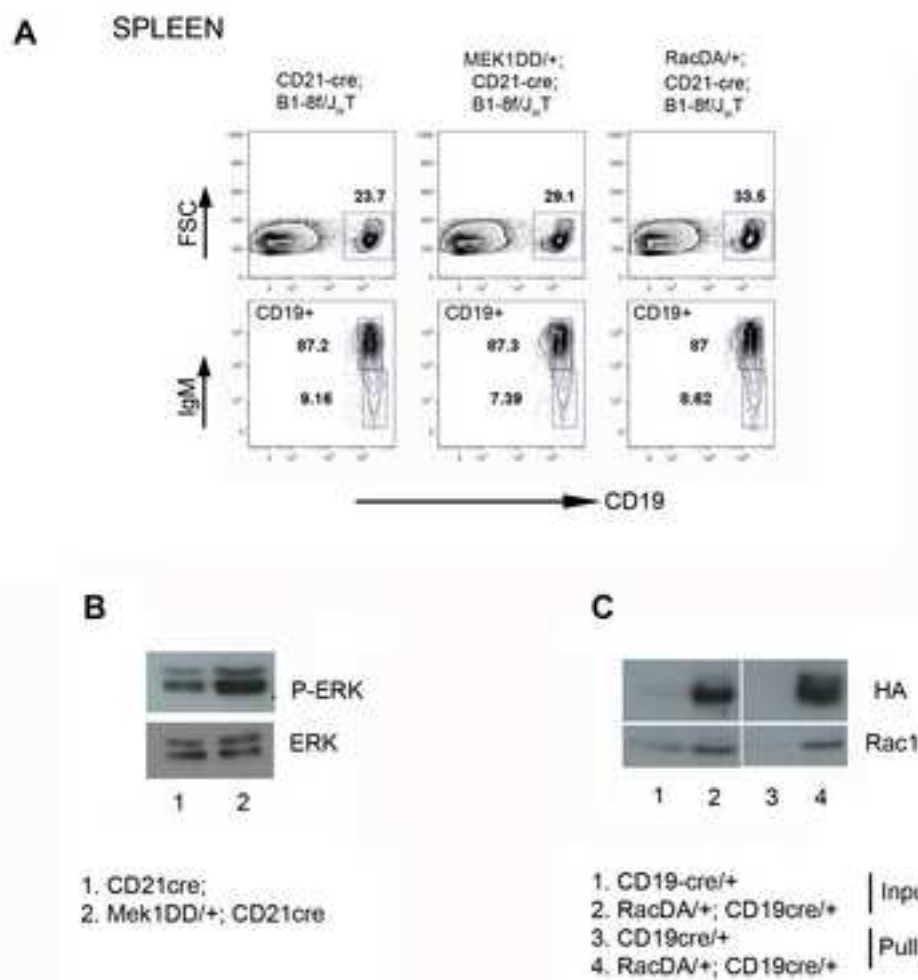

Supplementary Figure 5

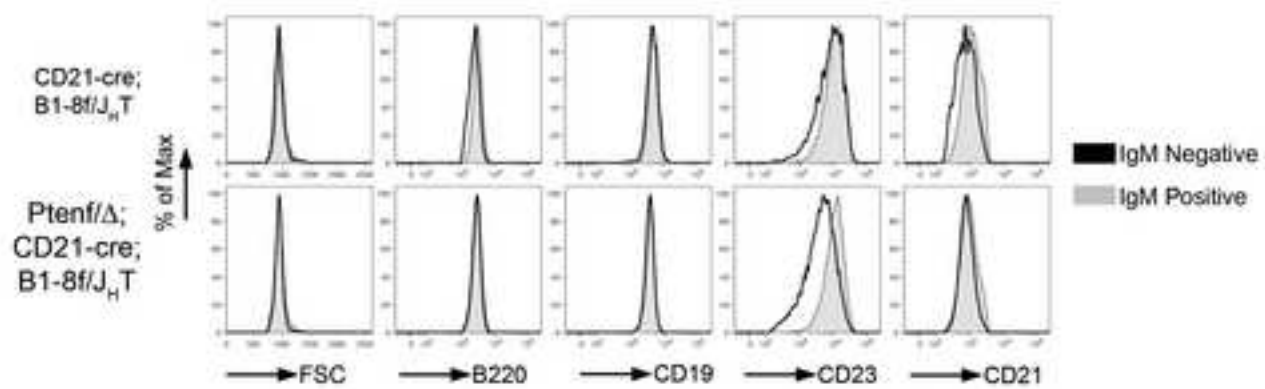

Supplementary Figure 6

Bone Marrow

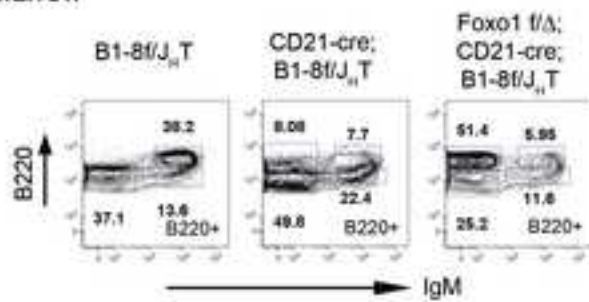

PEC

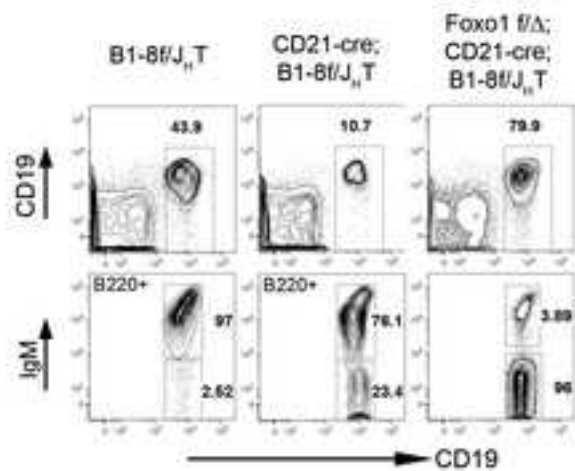

Supplementary Figure 7

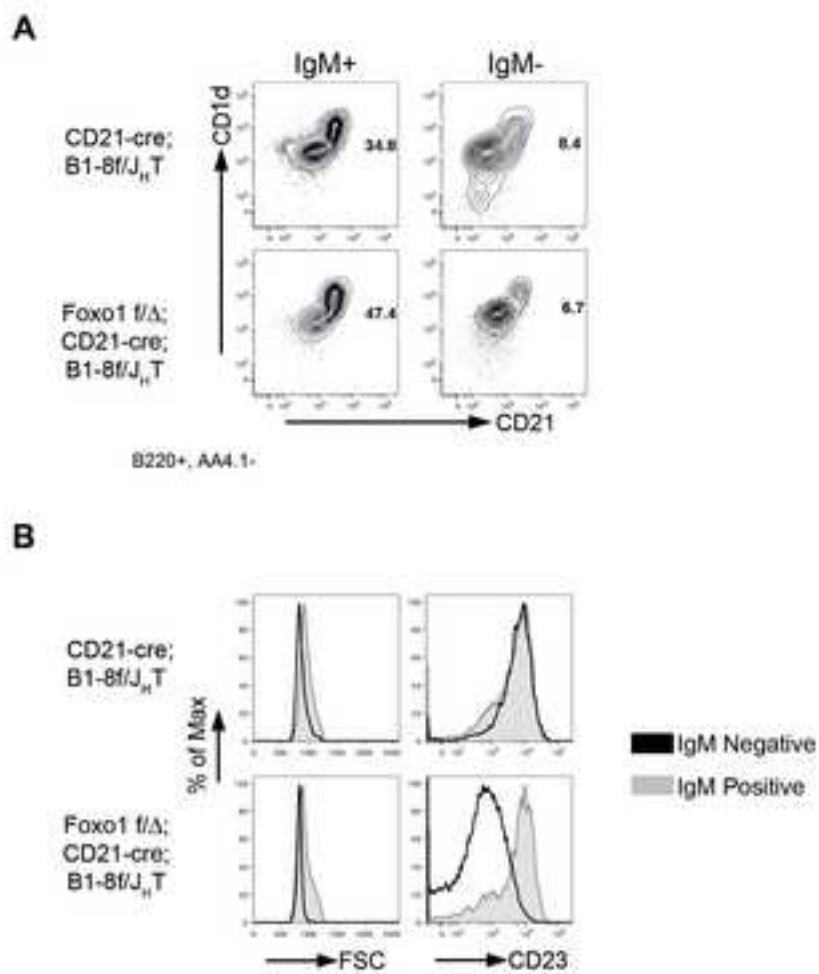

Supplementary Figure 8

**A**

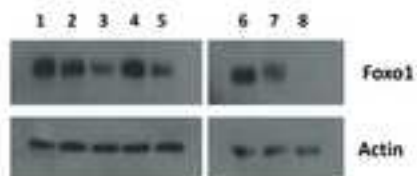

1. IgM+ CD21-cre; B1-8f/J<sub>H</sub>T
2. IgM+ P110\* /+; CD21-cre; B1-8f/J<sub>H</sub>T
3. IgM- P110\* /+; CD21-cre; B1-8f/J<sub>H</sub>T
4. IgM+ Ptenf/Δ; CD21-cre; B1-8f/J<sub>H</sub>T
5. IgM- Ptenf/Δ; CD21-cre; B1-8f/J<sub>H</sub>T
6. IgM+ Foxo1f/+; CD21-cre; B1-8f/J<sub>H</sub>T
7. IgM- Foxo1f/+; CD21-cre; B1-8f/J<sub>H</sub>T
8. IgM- Foxo1f/Δ; CD21-cre; B1-8f/J<sub>H</sub>T

**B**

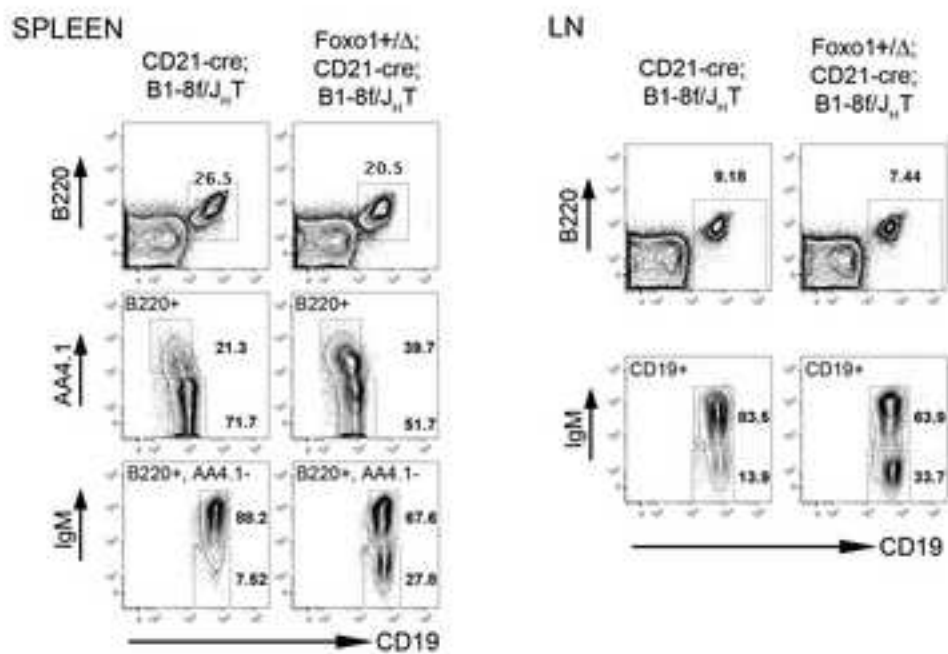

Supplementary Figure 9

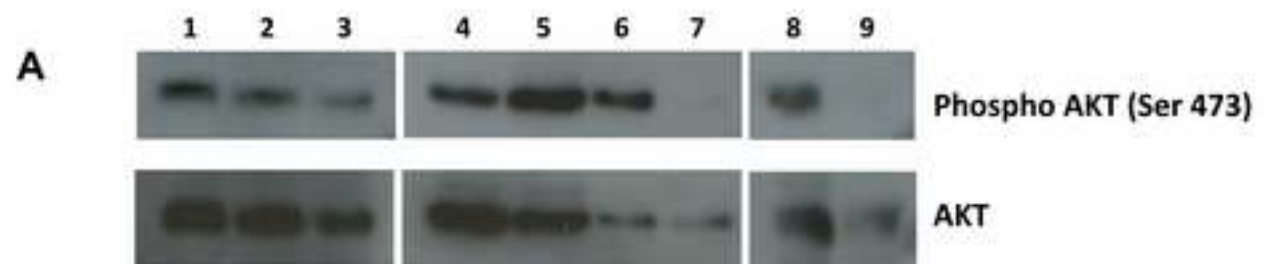

- 1. IgM+ CD21-cre; B1-8f/J<sub>H</sub>T
- 2&4 IgM+ |
- 3&5 IgM- | P110\* /+; CD21-cre; B1-8f/J<sub>H</sub>T
- 6&8 IgM+ |
- 7&9 IgM- | Foxo1f/+; CD21-cre; B1-8f/J<sub>H</sub>T

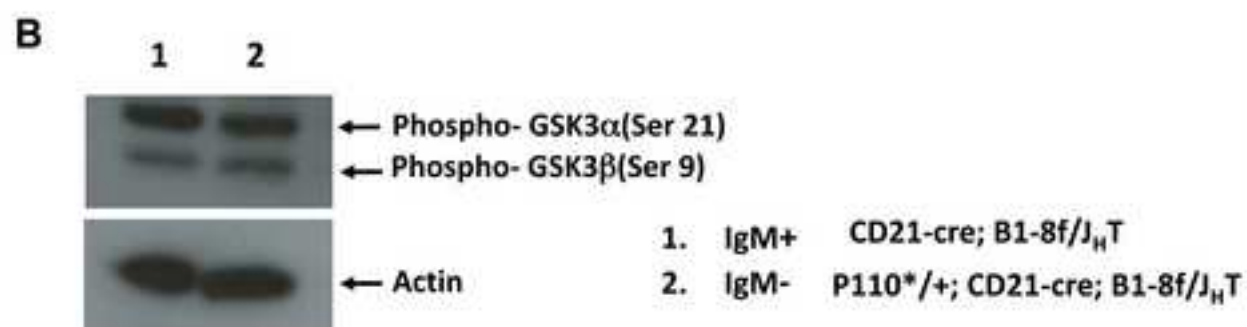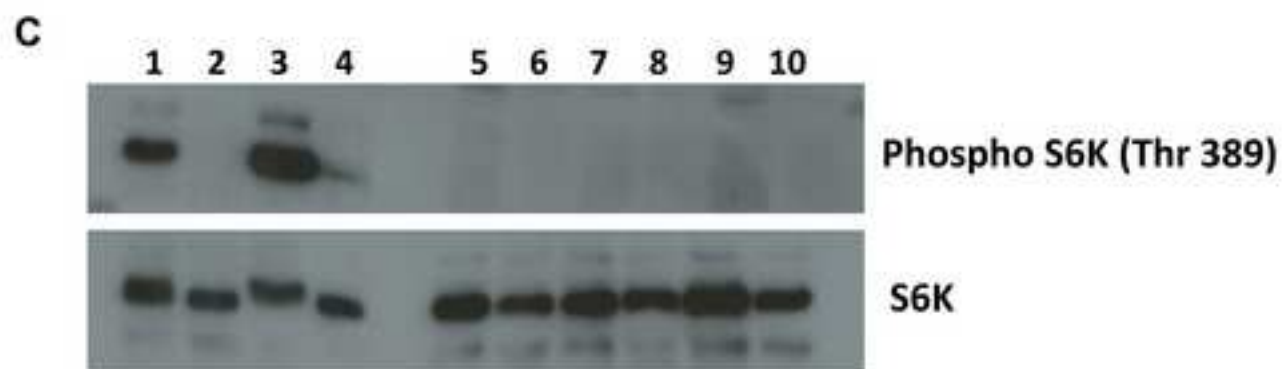

- 1. B cells
- 2. B cells + Ly294002(Ly)
- 3. B cells +Anti IgM
- 4. B cells +Ly & Anti IgM
- 5. IgM+ |
- 6. IgM- | P110\* /+; CD21-cre; B1-8f/J<sub>H</sub>T
- 7. IgM+ |
- 8. IgM- | Ptenf/Δ; CD21-cre; B1-8f/J<sub>H</sub>T
- 9. IgM+ |
- 10. IgM- | Foxo1f/+; CD21-cre; B1-8f/J<sub>H</sub>T
